# Supplementary material for: Exploring co-crystallisation as a technique for taste-masking of nevirapine
Source: Royal Society of Chemistry journal article supplement (doi:10.1039/d3pm00074e), 2024-01-01
Supplement: d3pm00074e1.pdf [file d3pm00074e1.pdf]

## Exploring Co-crystallisation as a Technique for Taste Masking of Nevirapine

Yichun Shen<sup>a</sup>, Marique Aucamp<sup>b</sup>, Hend E. Abdelhakim<sup>c</sup>, Xiunan Li<sup>d</sup>, Yusuf Ghazali<sup>b</sup>,  
Katharina Edkins<sup>a,e\*</sup>

<sup>a</sup> School of Health Sciences, University of Manchester, Stopford Building, Oxford Road, Manchester M13 9PT, UK

<sup>b</sup> School of Pharmacy, Faculty of Natural Sciences, University of the Western Cape, Bellville 7535, South Africa

<sup>c</sup> Global Business School for Health, University College London (UCL), 7 Sidings Street, London, E20 2AE, UK

<sup>d</sup> Department of Pharmaceutics, UCL School of Pharmacy, 29-39 Brunswick Square, London WC1N 1AX, UK

<sup>e</sup> Institute of Pharmacy and Biomedical Sciences, Strathclyde University, 161 Cathedral Street, Glasgow G4 0RE, UK

### Supporting Information

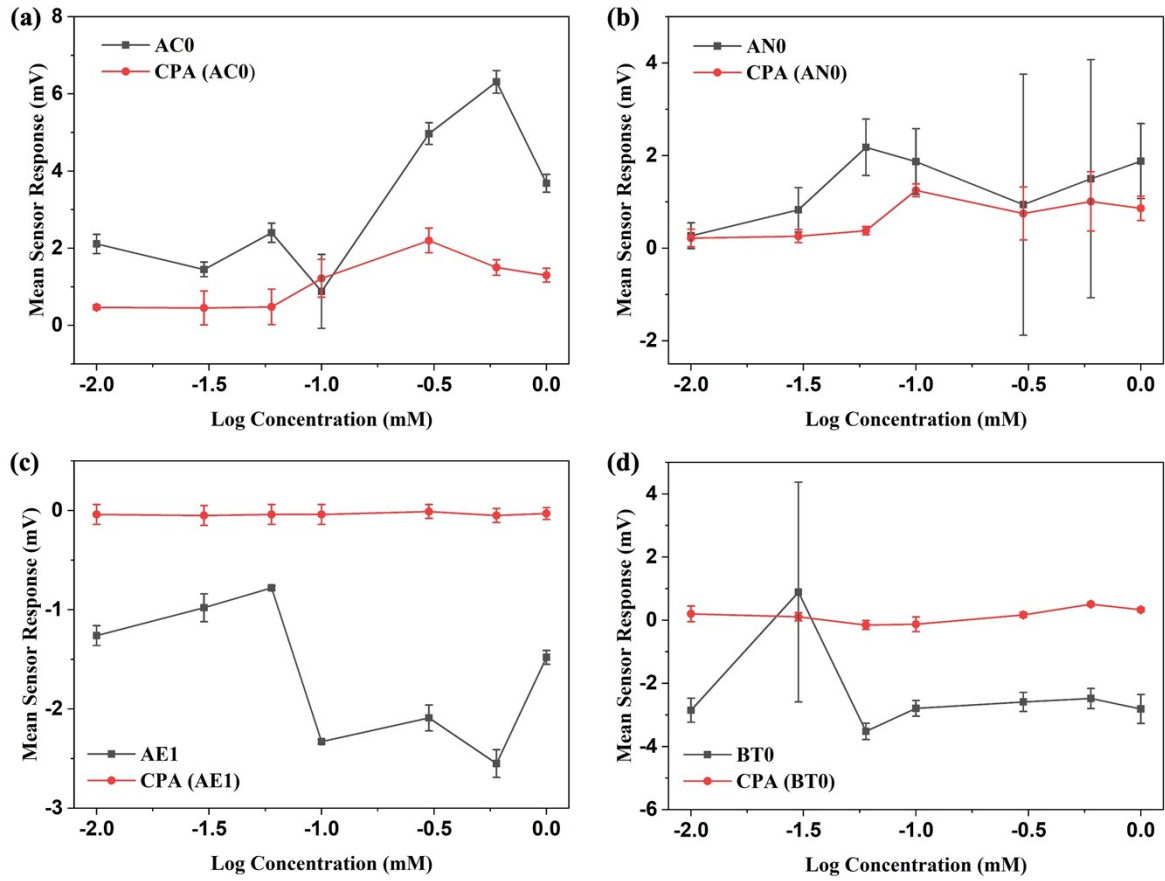

**Figure S1** Dose-response curve representing initial taste and aftertaste (CPA) for NVP as detected by (a) AC0, (b) AN0, (c) AE1 and (d) BT0 sensor.

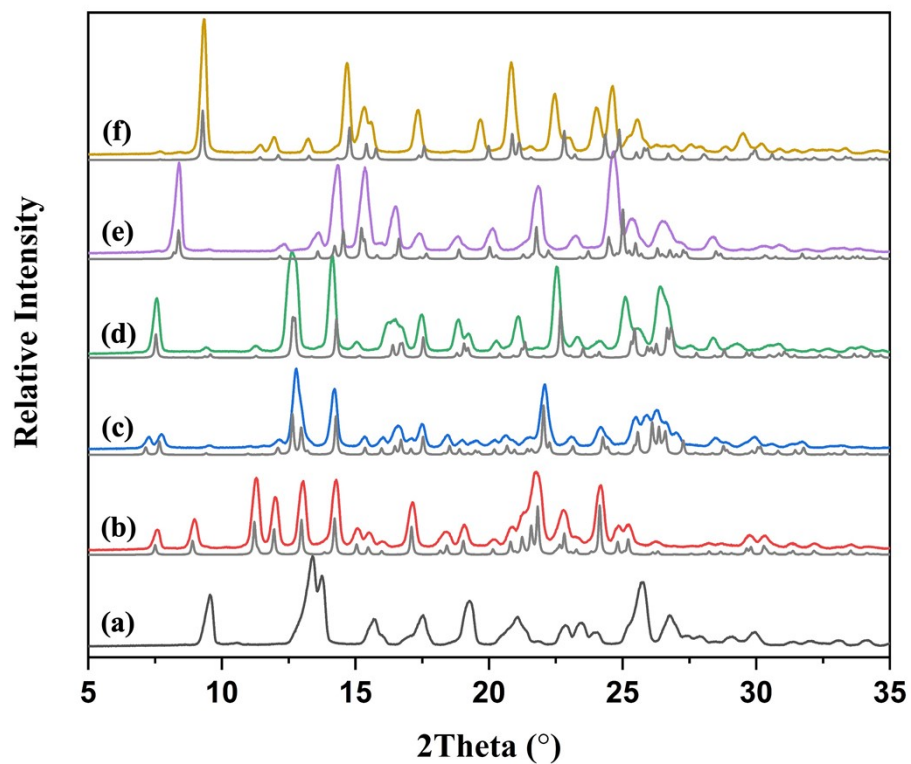

**Figure S2** PXRD patterns of (a) NVP and co-crystal (b) NVP-BA, (c) NVP-SAC, (d) NVP-SA, (e) NVP-GTA and (f) NVP-MA with the coloured lines from ball mill experiment and the grey lines from simulation. (Refcode: RUTRAC, LATQOO, LATQUU, LATQEE and LATQII, respectively)

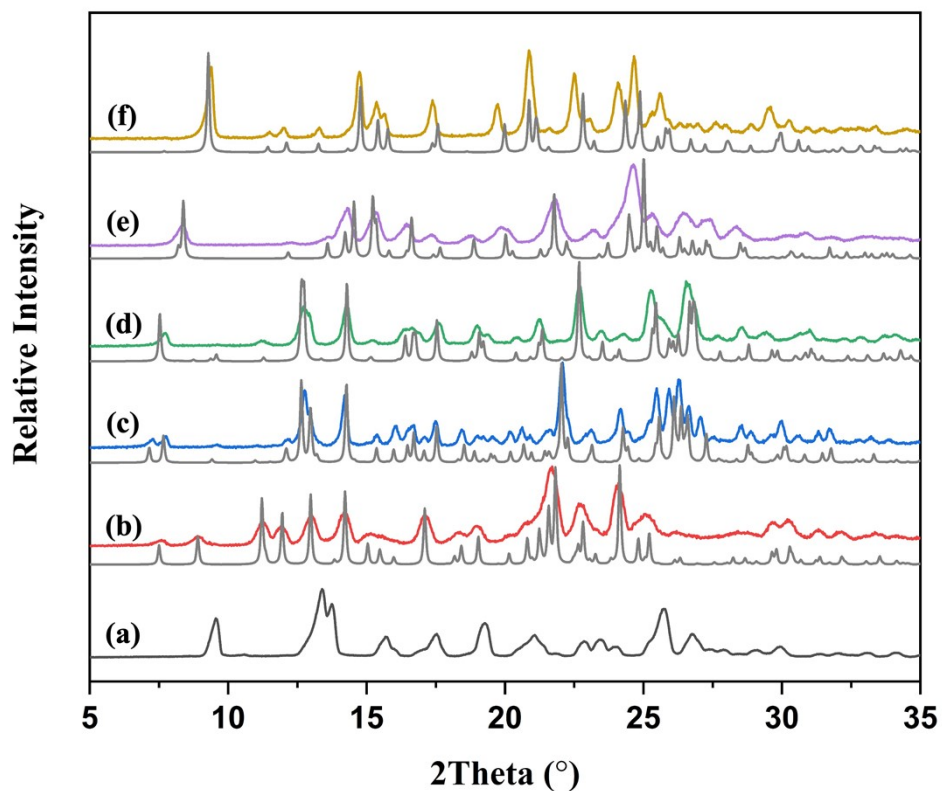

**Figure S3** PXR D patterns of (a) NVP and co-crystal (b) NVP-BA, (c) NVP-SAC, (d) NVP-SA, (e) NVP-GTA and (f) NVP-MA with the coloured lines from slurry crystallisation experiment in acetone and the grey lines from simulation. (Refcode: RUTRAC, LATQOO, LATQUU, LATQEE and LATQII, respectively)

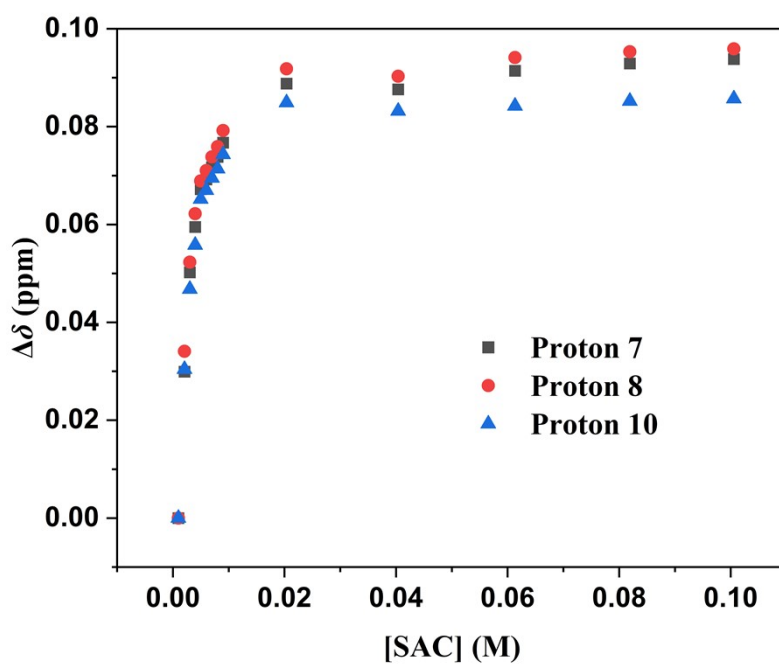

**Figure S4** Chemical shifts of SAC protons in acetone-d<sub>6</sub> in <sup>1</sup>H NMR dilution.

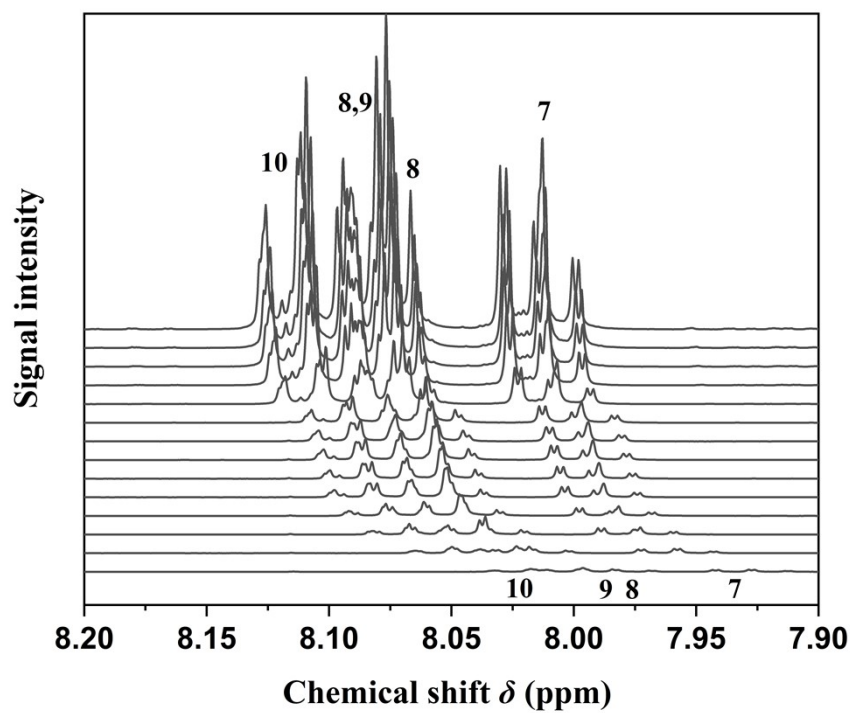

**Figure S5** <sup>1</sup>H NMR peak shift of SAC protons 7-10 in the dilution experiment in acetone-d<sub>6</sub> (there is an overlap between proton 8 and 9).
